# Supplementary material for: Oligothiophene/graphene supramolecular ensembles managing light induced processes: preparation, characterization, and femtosecond transient absorption studies leading to charge-separation
Source: Royal Society of Chemistry journal article supplement (doi:10.1039/c5nr04875c), 2015-01-01
Supplement: c5nr04875c1.pdf [file c5nr04875c1.pdf]

## Electronic Supporting Information

### Oligothiophene/graphene supramolecular ensembles managing photoinduced charge-transfer processes: Preparation, characterization, and electrochemical and photophysical properties leading to charge-separation

A. Stergiou,<sup>a</sup> H. B. Gobeze,<sup>b</sup> I. D. Petsalakis,<sup>a</sup> S. Zhao,<sup>c</sup> H. Shinohara,<sup>c</sup> F. D'Souza<sup>b,\*</sup>  
and N. Tagmatarchis<sup>a,\*</sup>

<sup>a</sup>Theoretical and Physical Chemistry Institute  
National Hellenic Research Foundation  
48 Vassileos Contantinou Avenue, Athens 11635, Greece

<sup>b</sup> Department of Chemistry, University of North Texas, 1155 Union Circle, #305070, Denton, TX  
76203-5017, USA

<sup>c</sup> Department of Chemistry, Nagoya University, Nagoya 464-8602, Japan

### Contents

- Figure S1:** <sup>1</sup>H NMR spectrum of **3T**.
- Figure S2:** <sup>13</sup>C NMR spectrum of **3T**.
- Figure S3:** Mass spectrum of **3T**.
- Figure S4:** <sup>1</sup>H NMR spectrum of **9T**.
- Figure S5:** <sup>13</sup>C NMR spectrum of **9T**.
- Figure S6:** Mass spectrum of **9T**.
- Figure S7:** Deconvoluted 2D-band of **eG**.
- Figure S8:** Deconvoluted 2D-band of **3T/eG**.
- Figure S9:** Deconvoluted 2D-band of **9T/eG**.
- Figure S10:** ATR-IR spectrum of **eG**
- Figure S11:** ATR-IR spectra of **3T** and **3T/eG**.
- Figure S12:** ATR-IR spectra of **9T** and **9T/eG**.
- Figure S13:** Blank photoluminescence spectra of **3T** and mixed **3T** with **eG**.
- Figure S14:** UV-Vis and PL spectra of **3T**.
- Figure S15:** UV-Vis and PL spectra of **3T**.
- Figure S16:** CV graphs of **3T** and **3T/eG**.
- Figure S17:** CV graphs of **9T** and **9T/eG**.
- Figure S18:** Femto- and nano-second transient absorption spectra of **3T** and time profiles.
- Figure S19:** Femto- and nano-second transient absorption spectra of **9T** and time profiles.
- Figure S20:** Femtosecond transient absorption spectra of **eG** and time profiles.
- Figure S21:** Spectral changes observed during chemical oxidation of **9T**.

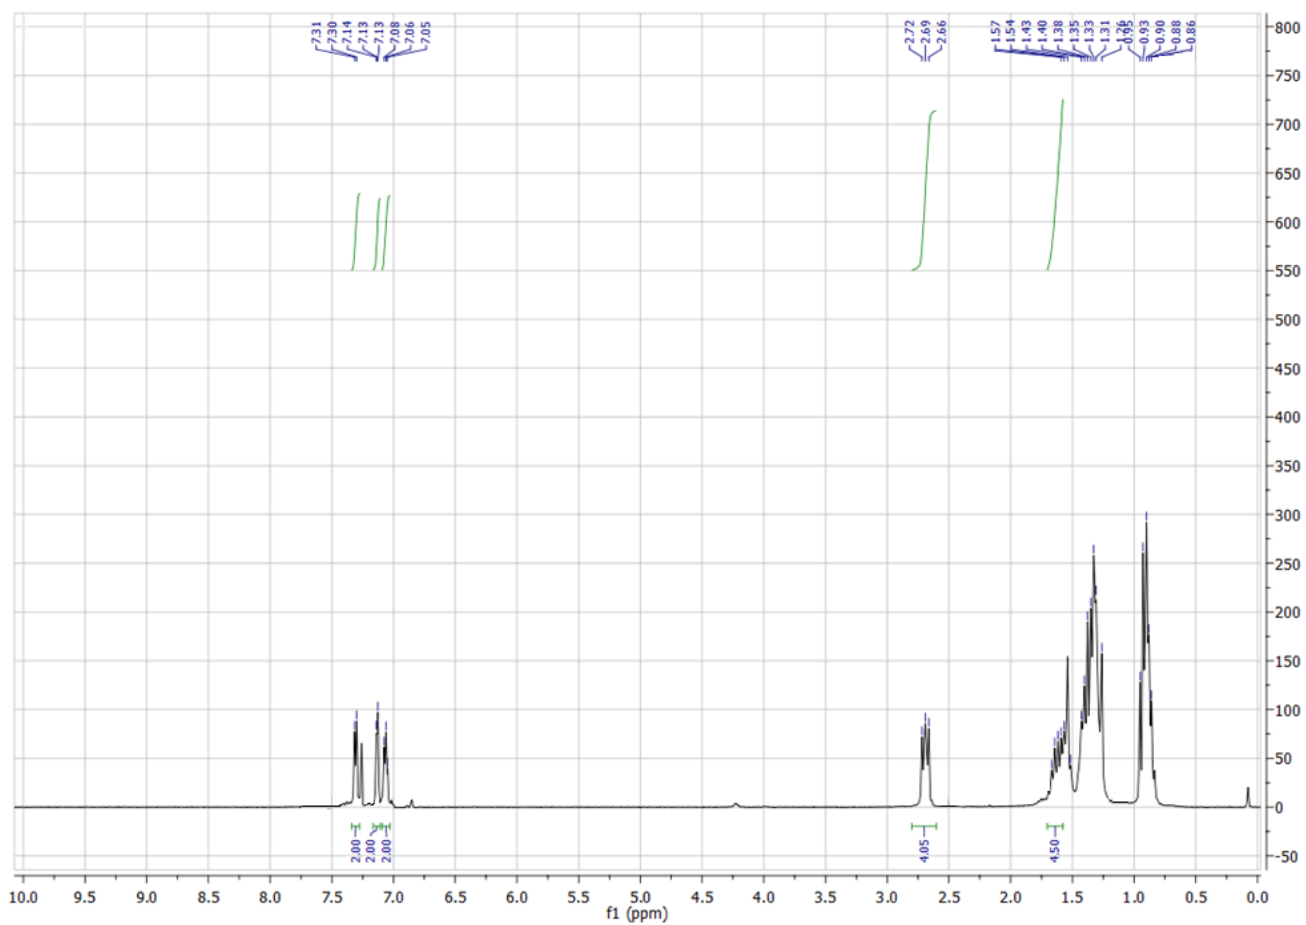

**Figure S1.**  $^1\text{H}$  NMR spectrum of terthiophene **3T**.

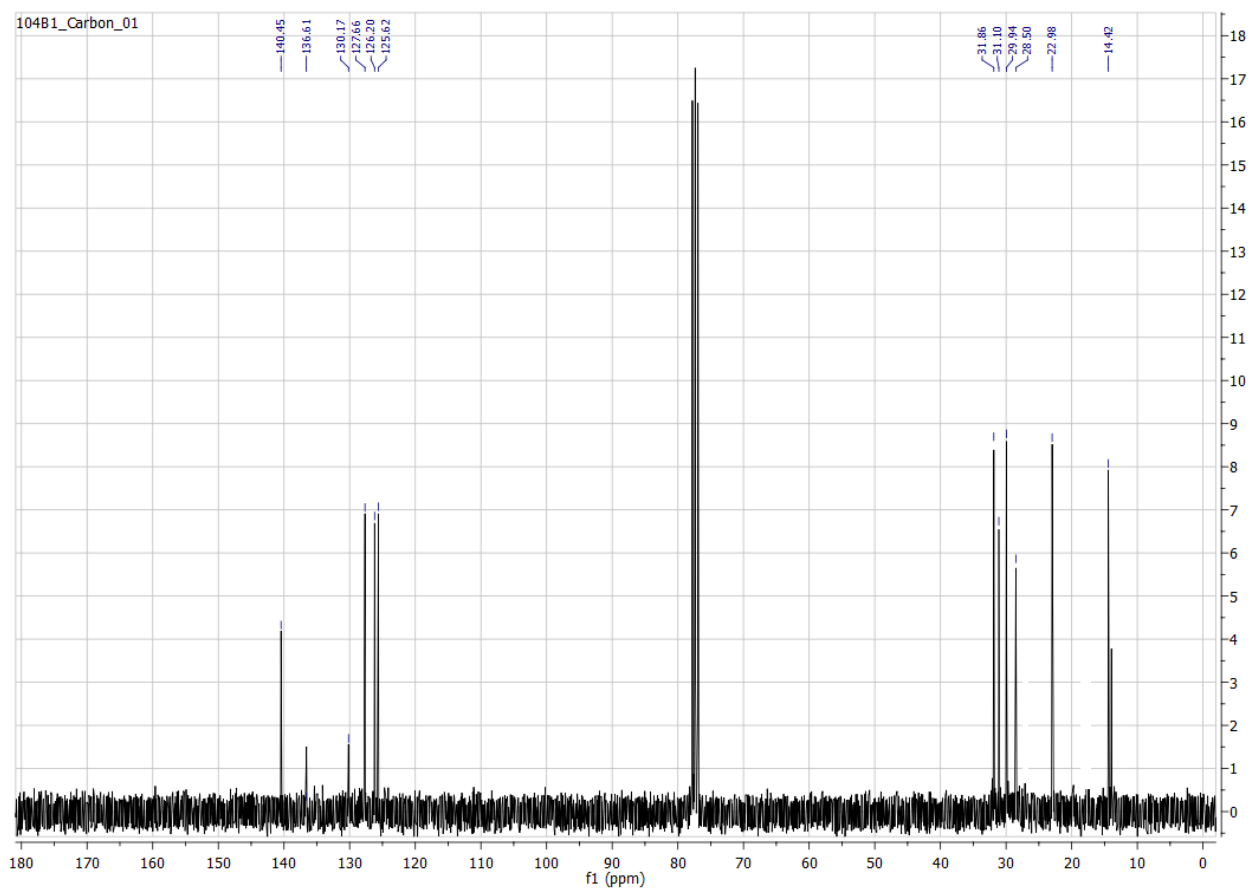

**Figure S2.**  $^{13}\text{C}$  NMR spectrum of terthiophene **3T**.

T: ITMS + c ESI Full ms [100.00-1100.00]

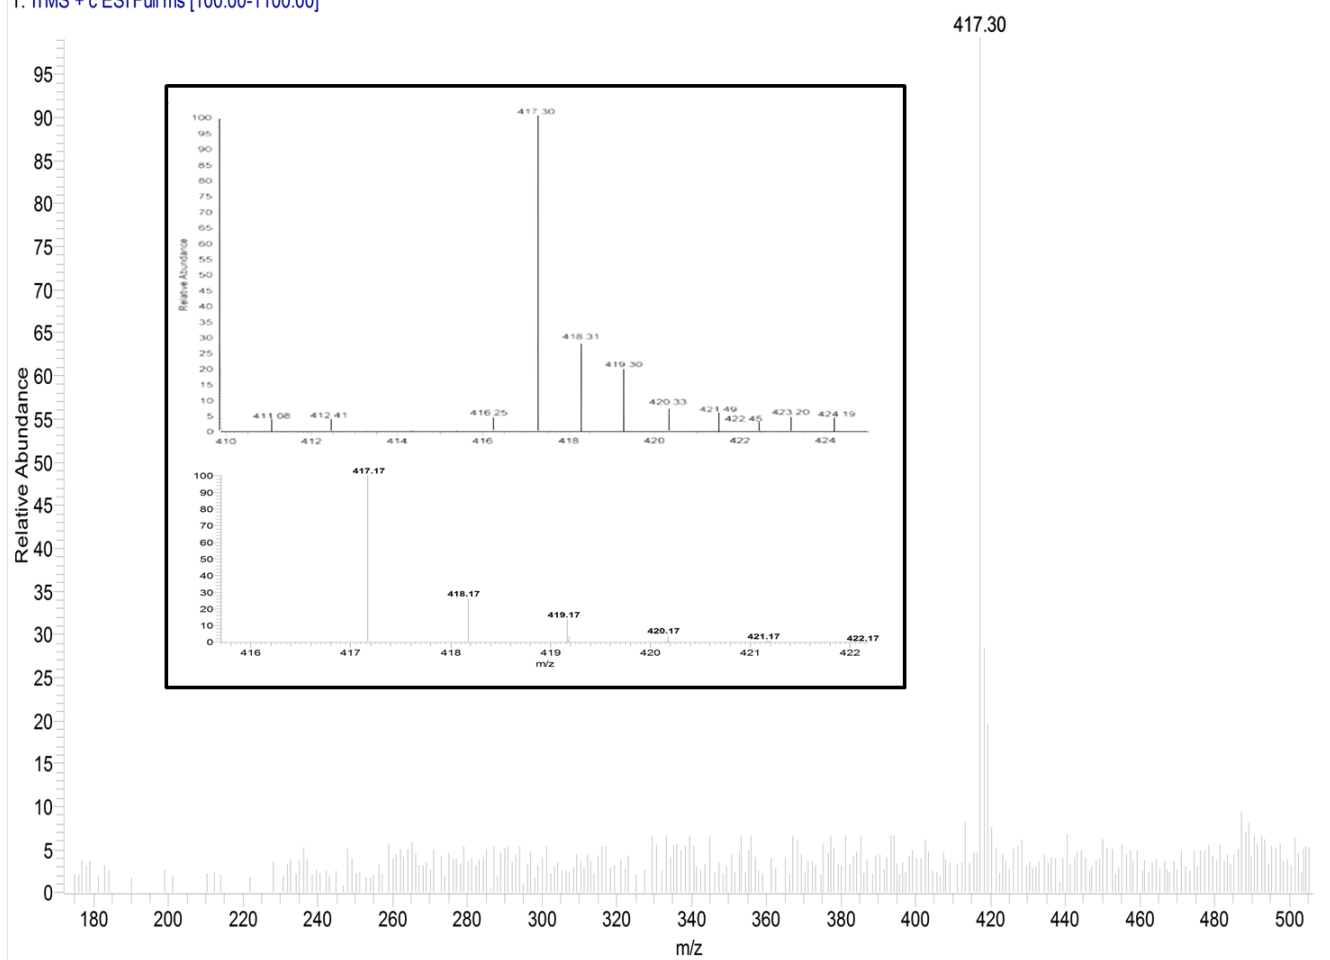

**Figure S3.** ESI mass spectrum of terthiophene **3T**, showing the  $[M+1]$  ion. At the inset, the expanded region of the  $[M+1]$  is shown in the upper panel, while the corresponding theoretically predicted isotopic distribution pattern is shown in the lower panel.

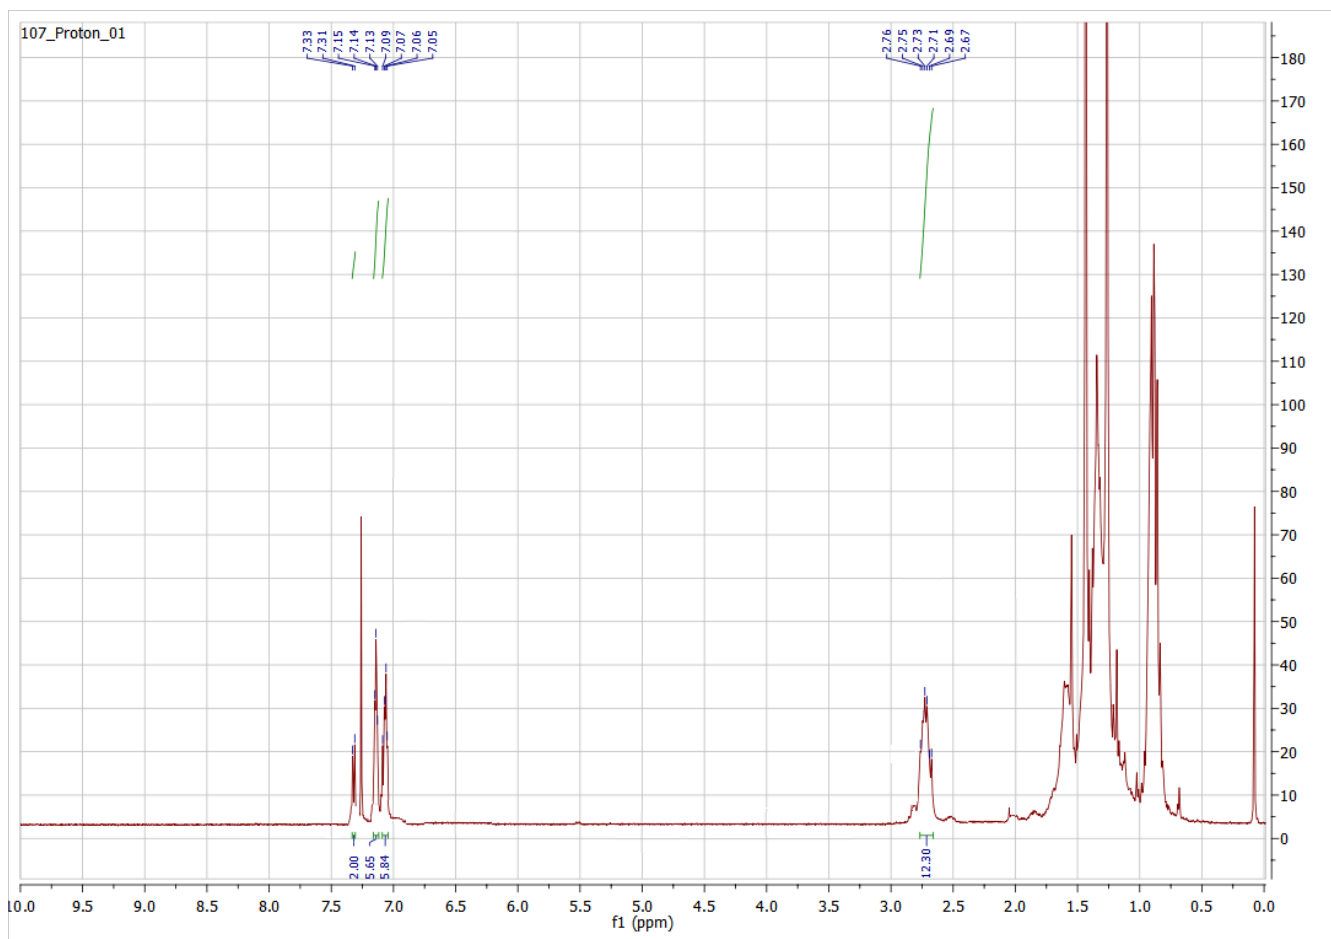

Figure S4.  $^1\text{H}$  NMR spectrum of **9T**.

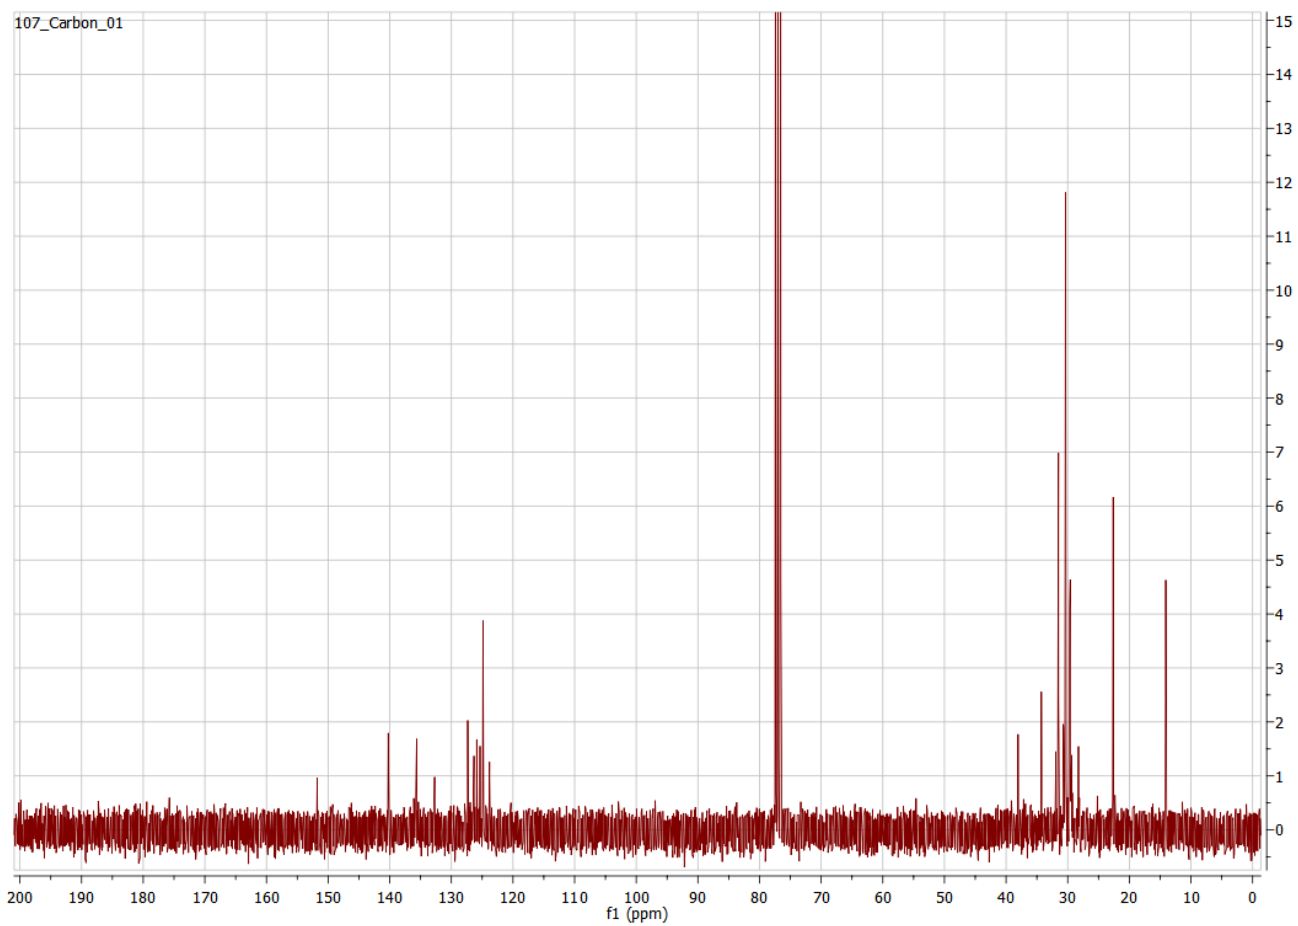

**Figure S5.**  $^{13}\text{C}$  NMR spectrum of **9T**.

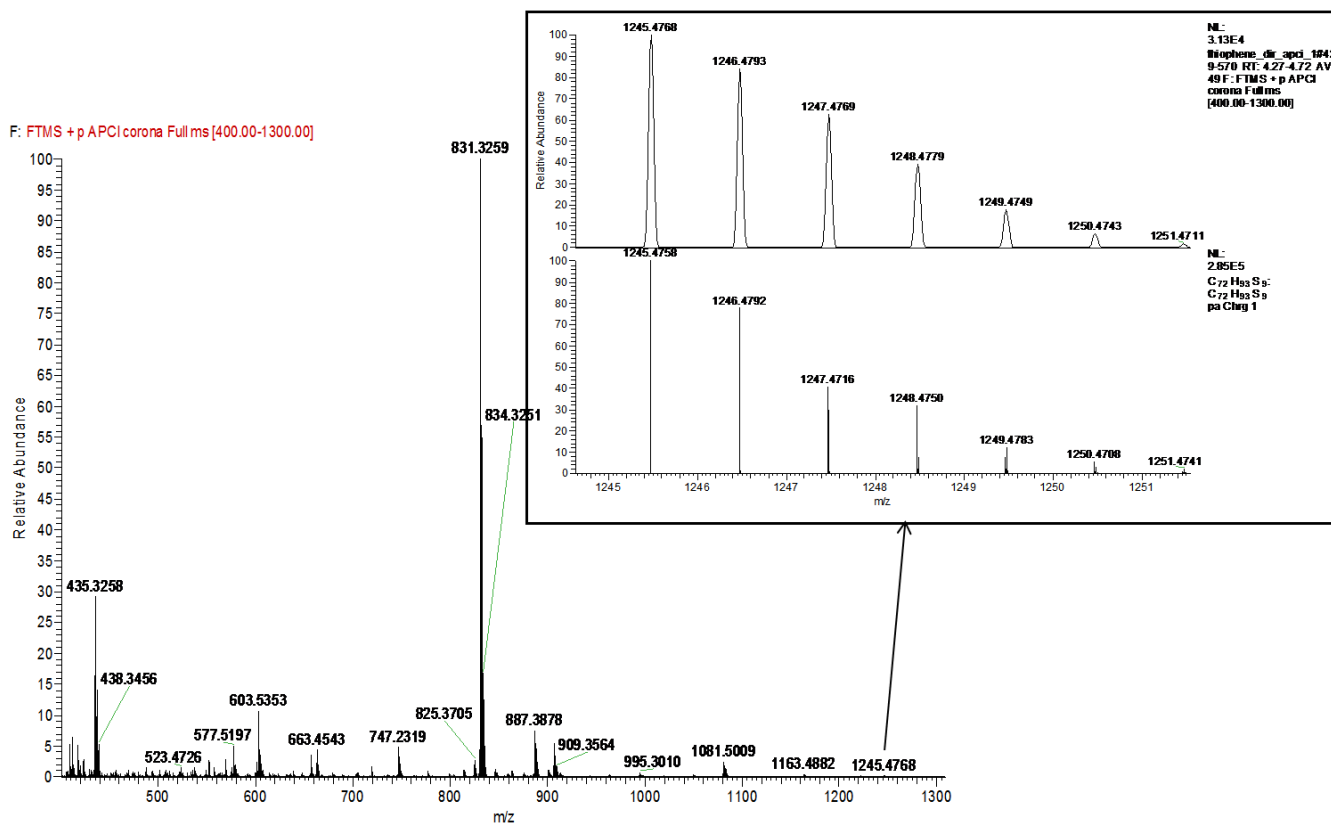

**Figure S6.** HR-MS of **9T**. At the inset, the expanded region of the  $[M+1]$  is shown in the upper panel, while the corresponding theoretically predicted isotopic distribution pattern is shown in the lower panel.

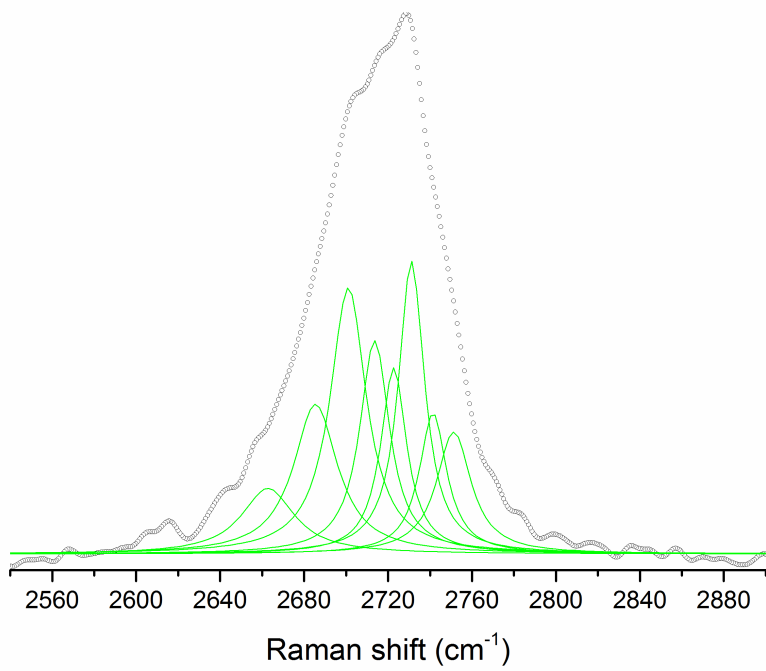

**Figure S7.** Deconvoluted 2D-band of eG.



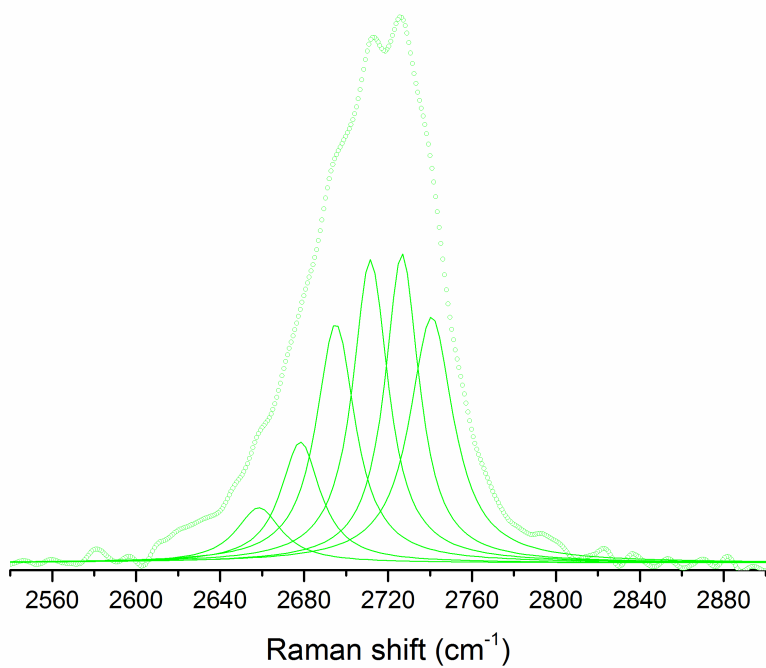

**Figure S8.** Deconvoluted 2D-band of 3T/eG ensemble.

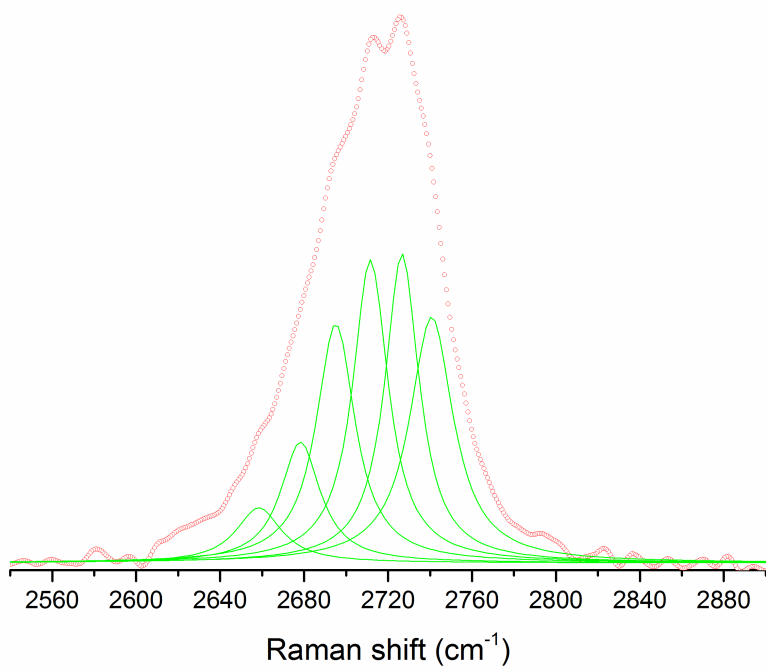

**Figure S9.** Deconvoluted 2D-band of 9T/eG ensemble.

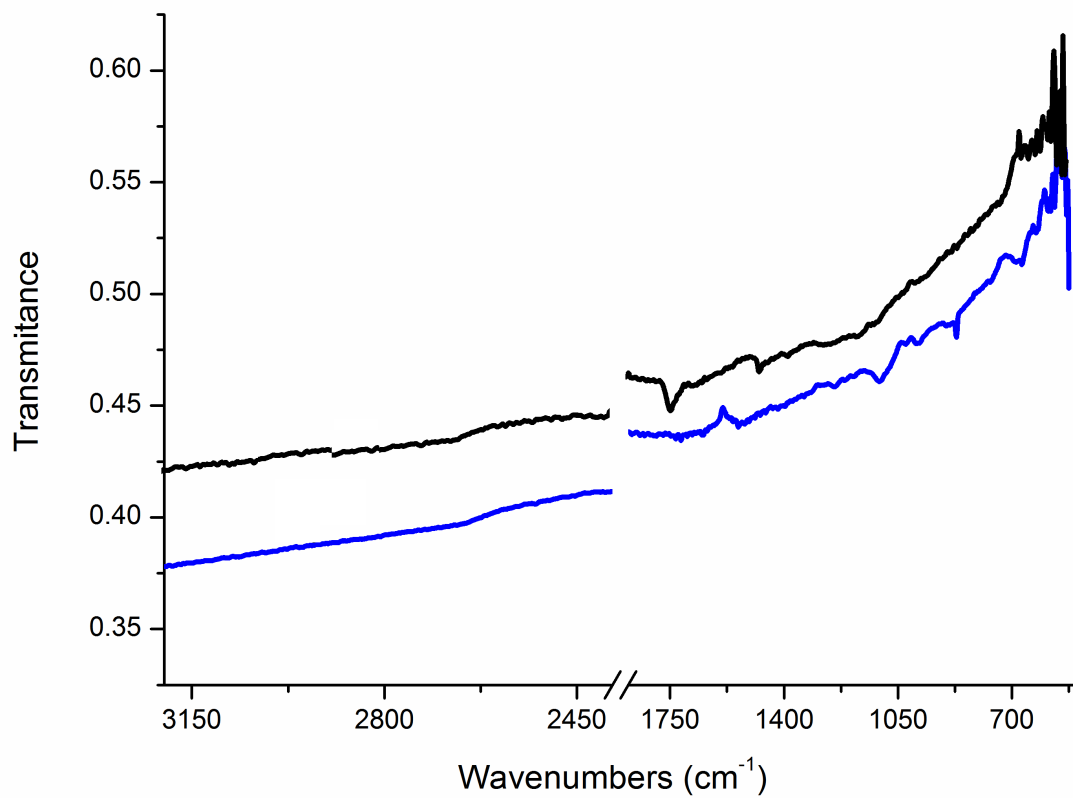

**Figure S10.** ATR-IR spectra of starting graphite flakes (black line) and eG (blue line).

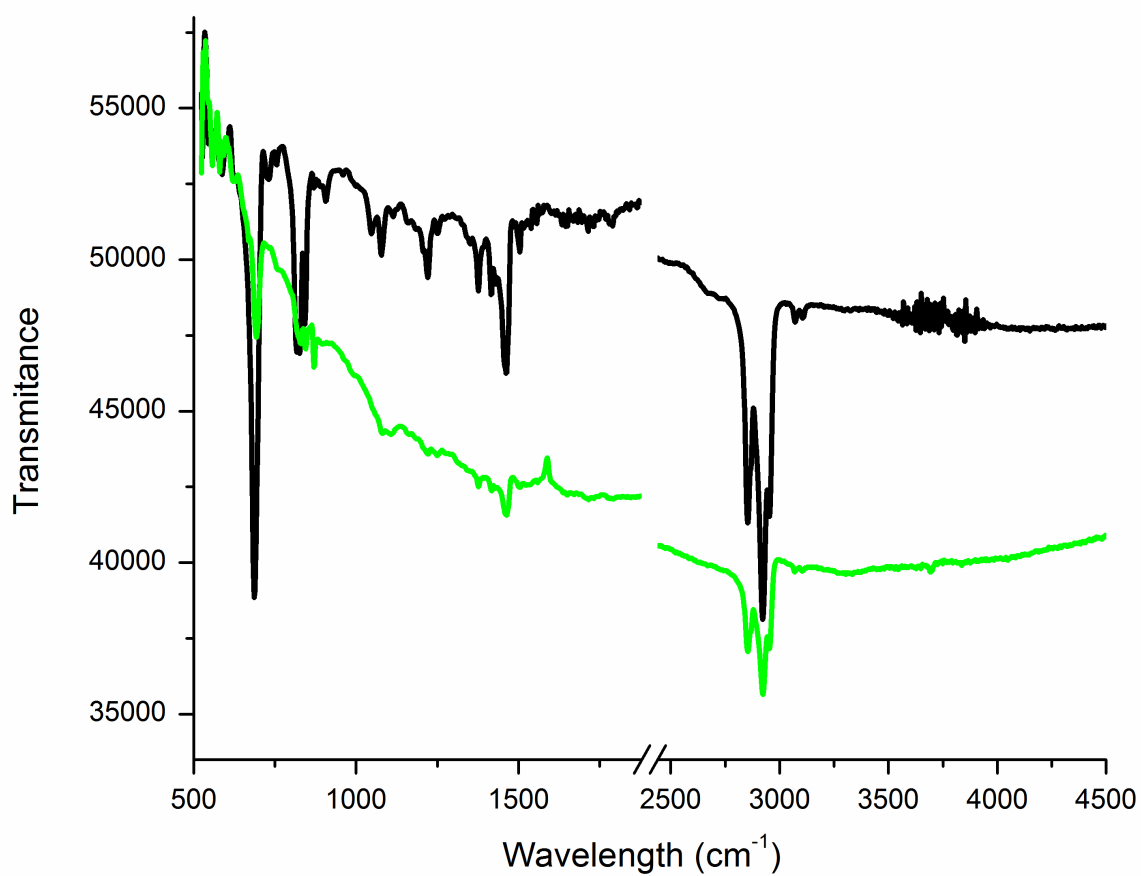

**Figure S11.** ATR-IR spectra of free 3T (black line) and 3T/eG ensemble (green line).

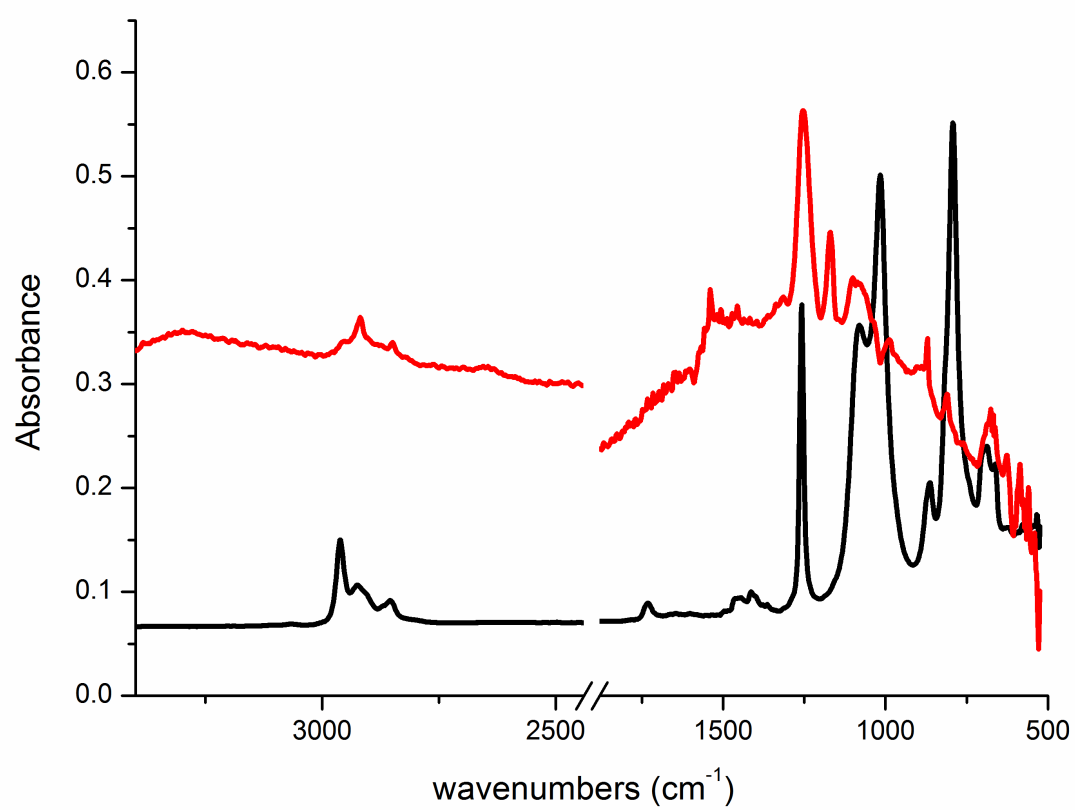

**Figure S12.** ATR-IR spectra of **9T** (black line) and **9T/eG** ensemble (red line).

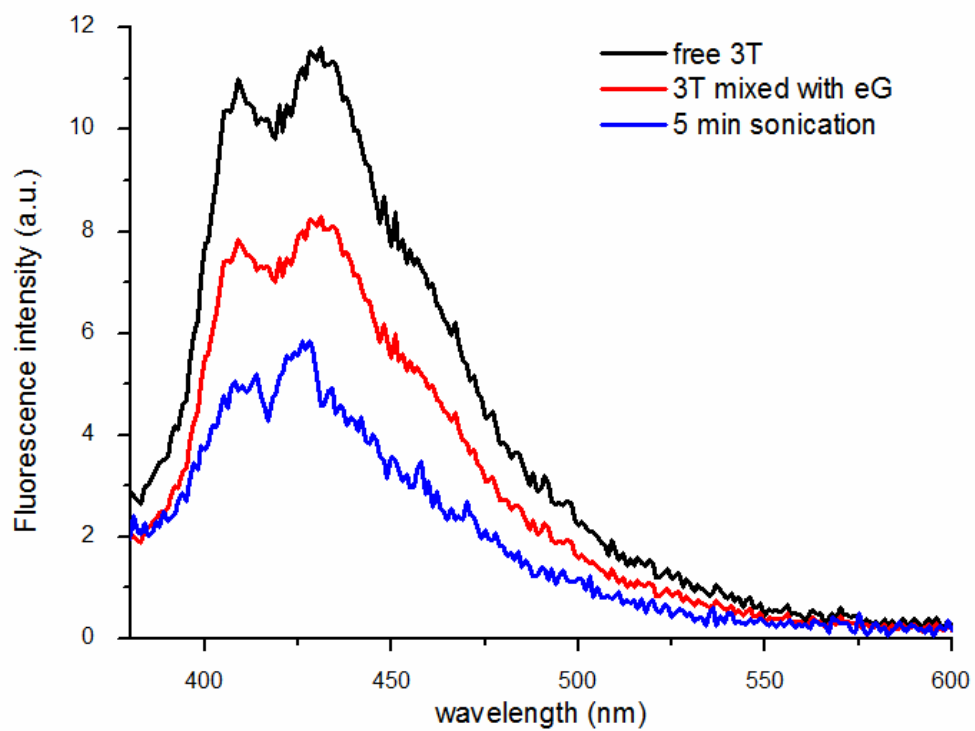

**Figure S13.** Blank photoluminescence spectra of **3T** and mixed **3T** with **eG**, obtained in THF with matching absorbance at the excitation wavelength of 330 nm.

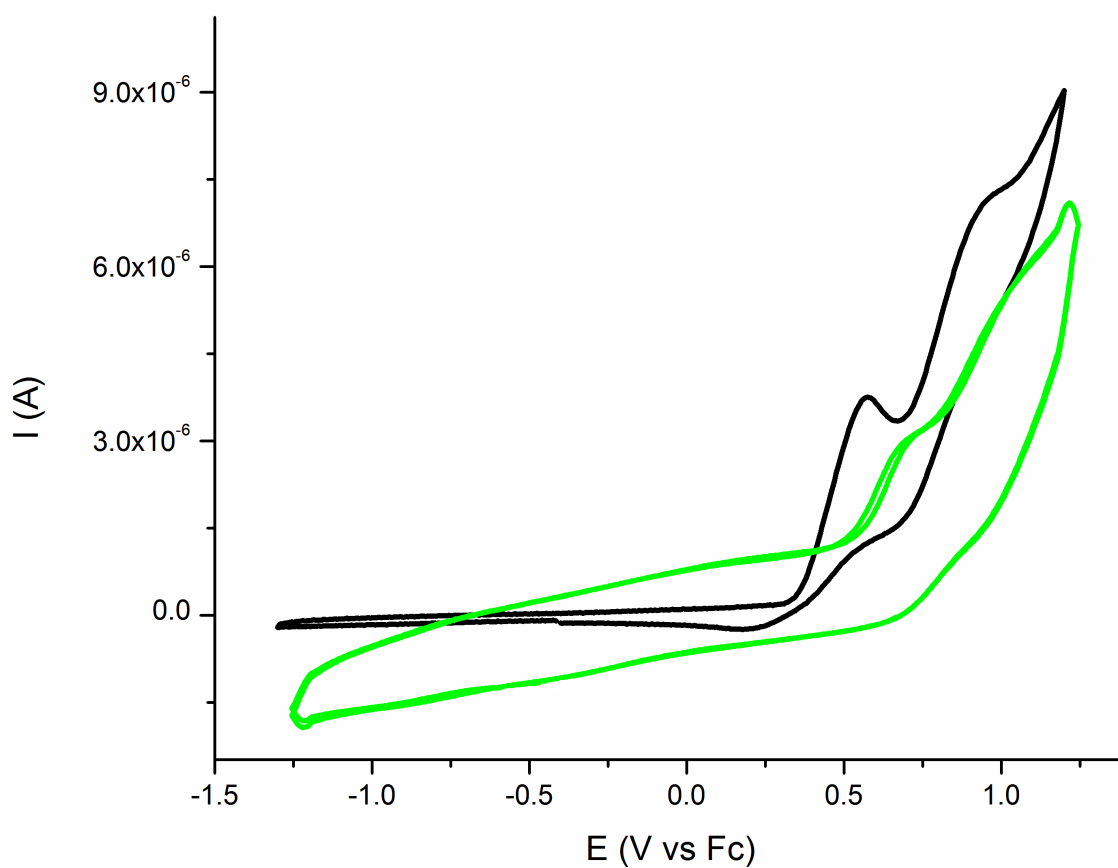

**Figure S14.** CV graphs of free 3T (black line) and 3T/eG ensemble (green line), recorded at 100 mV/s in  $\text{CH}_2\text{Cl}_2$  with 0.1M  $\text{TBAPF}_6$  as electrolyte.

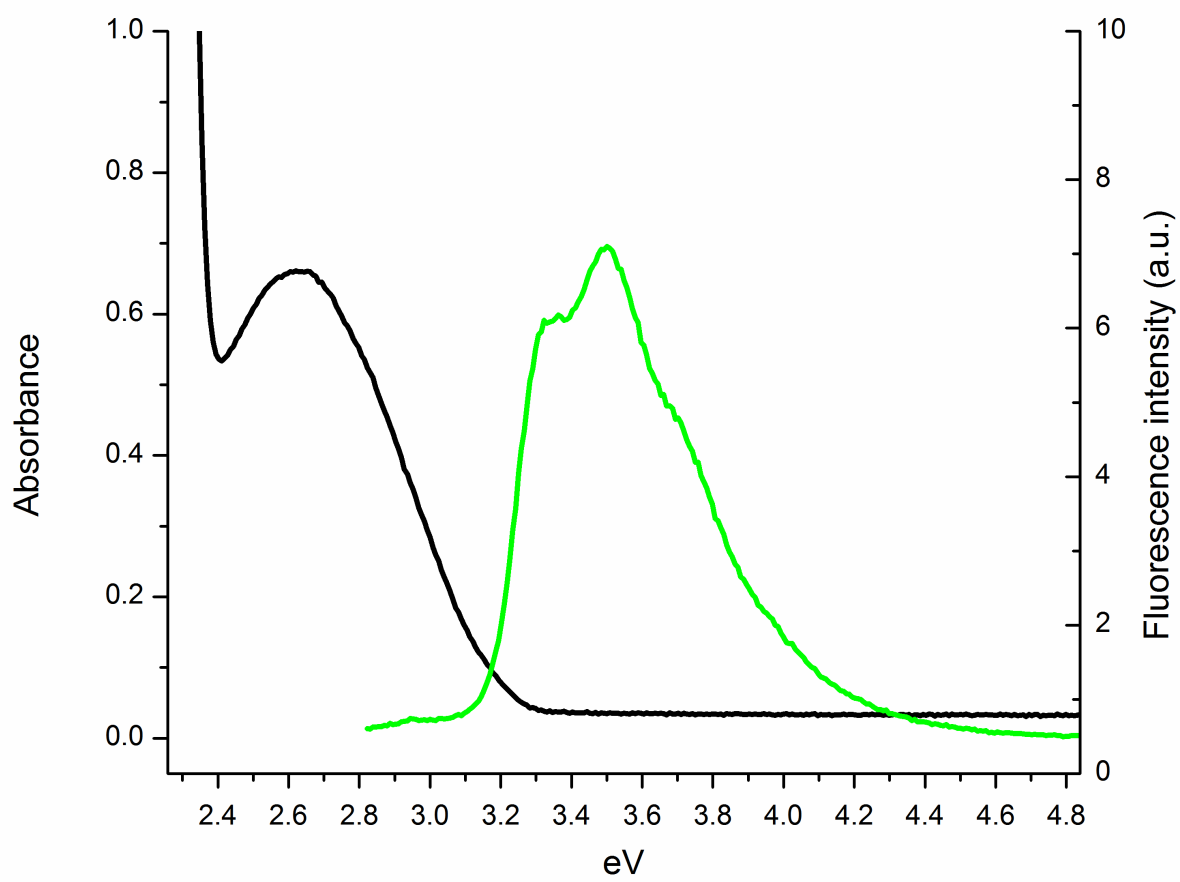

**Figure S15.** UV-Vis absorption and fluorescence emission spectra of free **3T**.



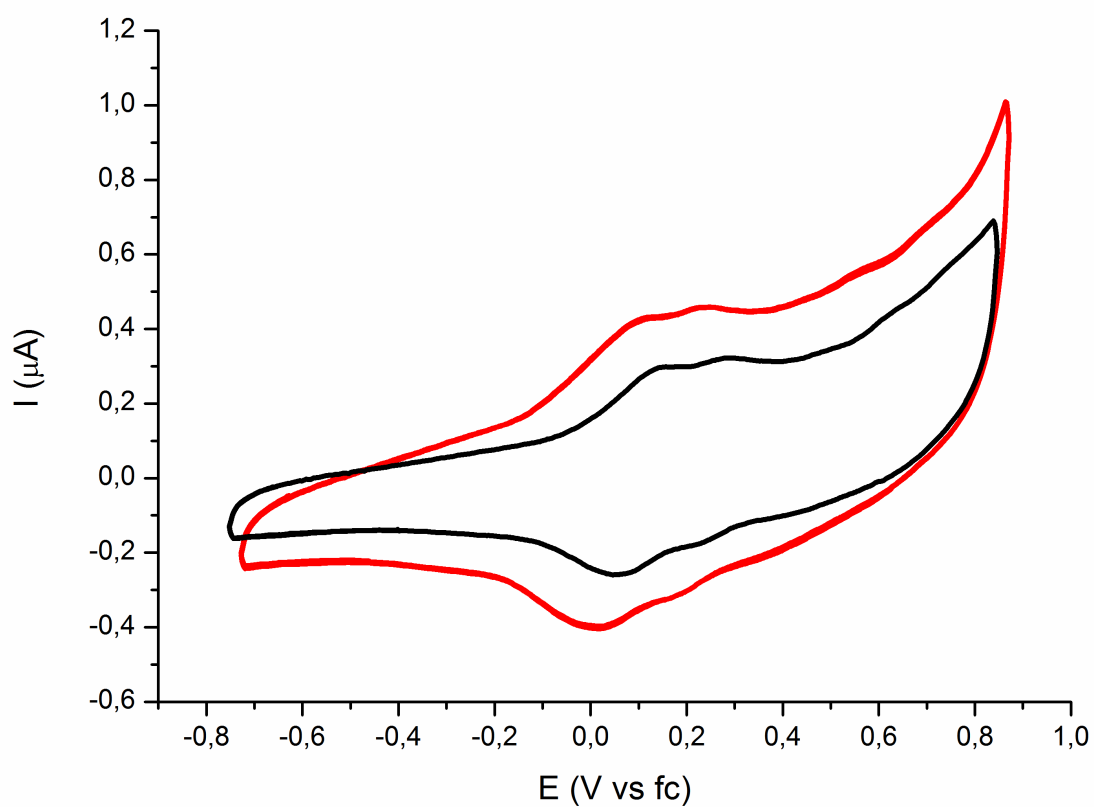

**Figure S16.** CV graphs of free **9T** (black line) and **9T/eG** ensemble (red line), recorded at 100 mV/s in  $\text{CH}_2\text{Cl}_2$  with 0.1M  $\text{TBAPF}_6$  as electrolyte.

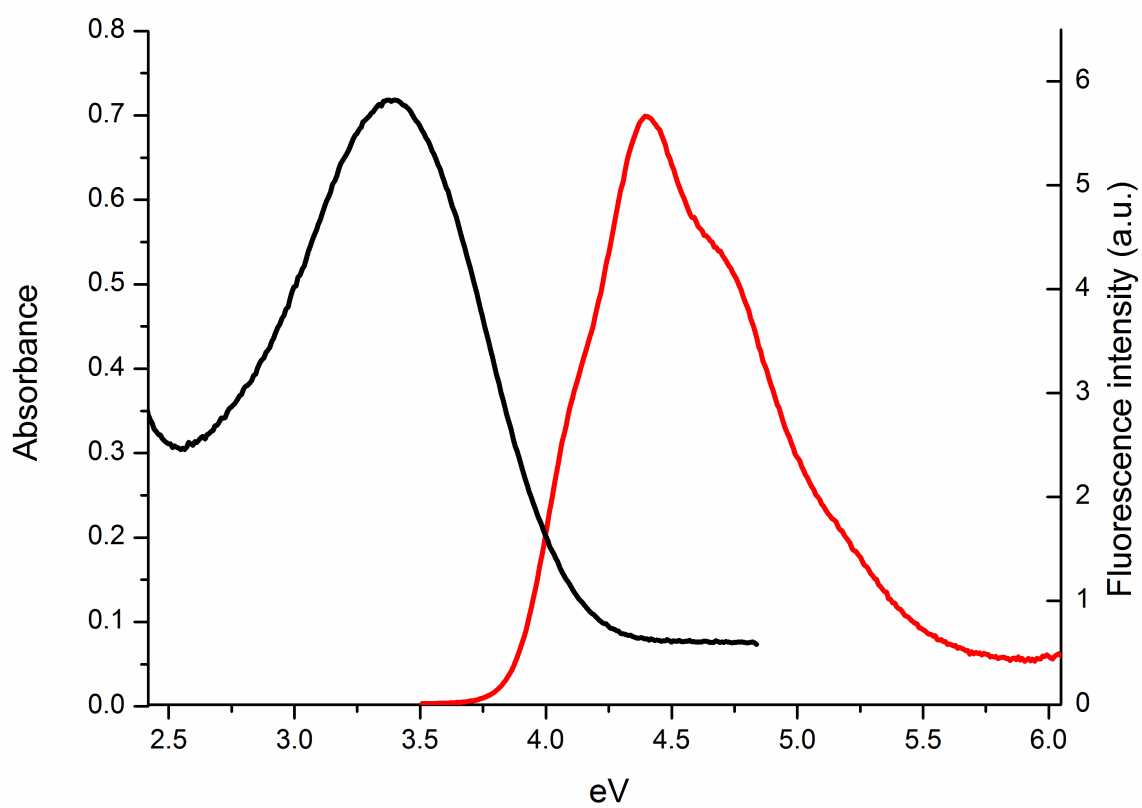

**Figure S17.** UV-Vis absorbance and fluorescence emission spectra of free **9T**.

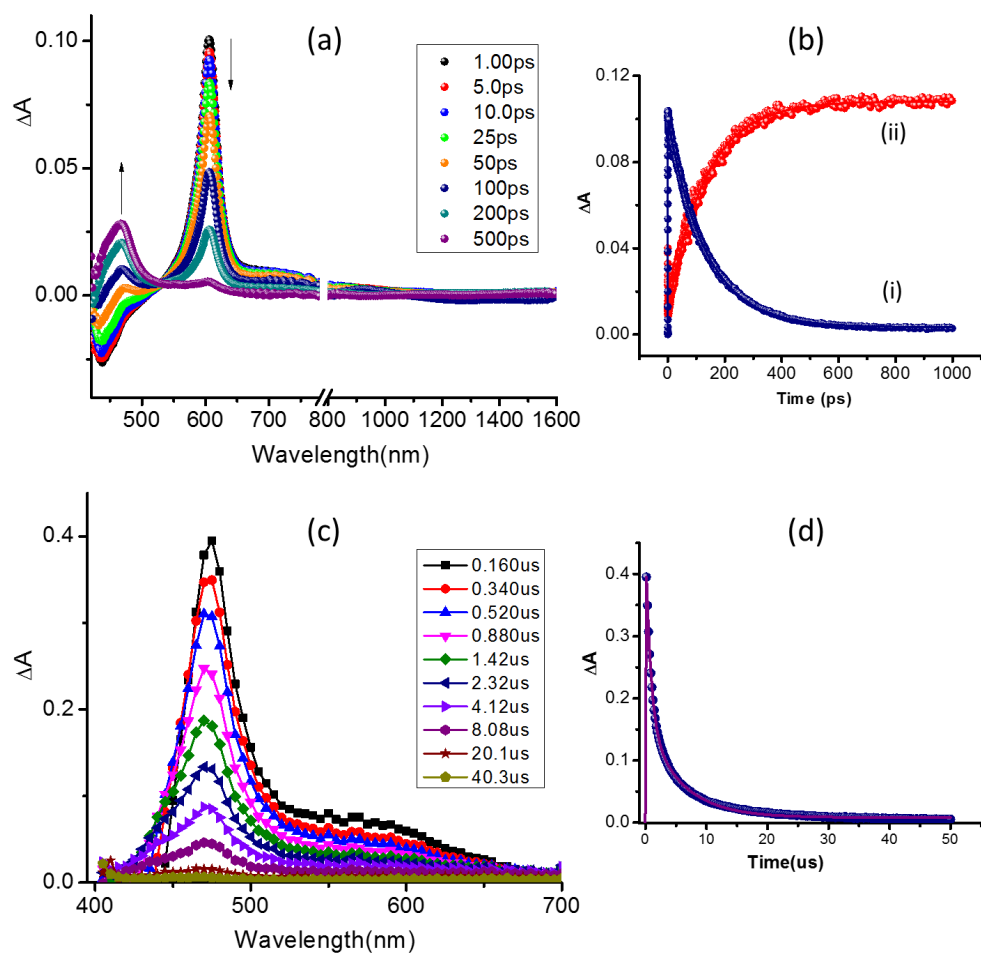

**Figure S18.** (a) Femtosecond transient absorption spectra of **3T** in THF, (b) time profiles of (i) 601 nm peak and (ii) 470 nm peak, (c) nanosecond transient spectra of **3T** in THF, and (d) time profile of the 470 nm peak.

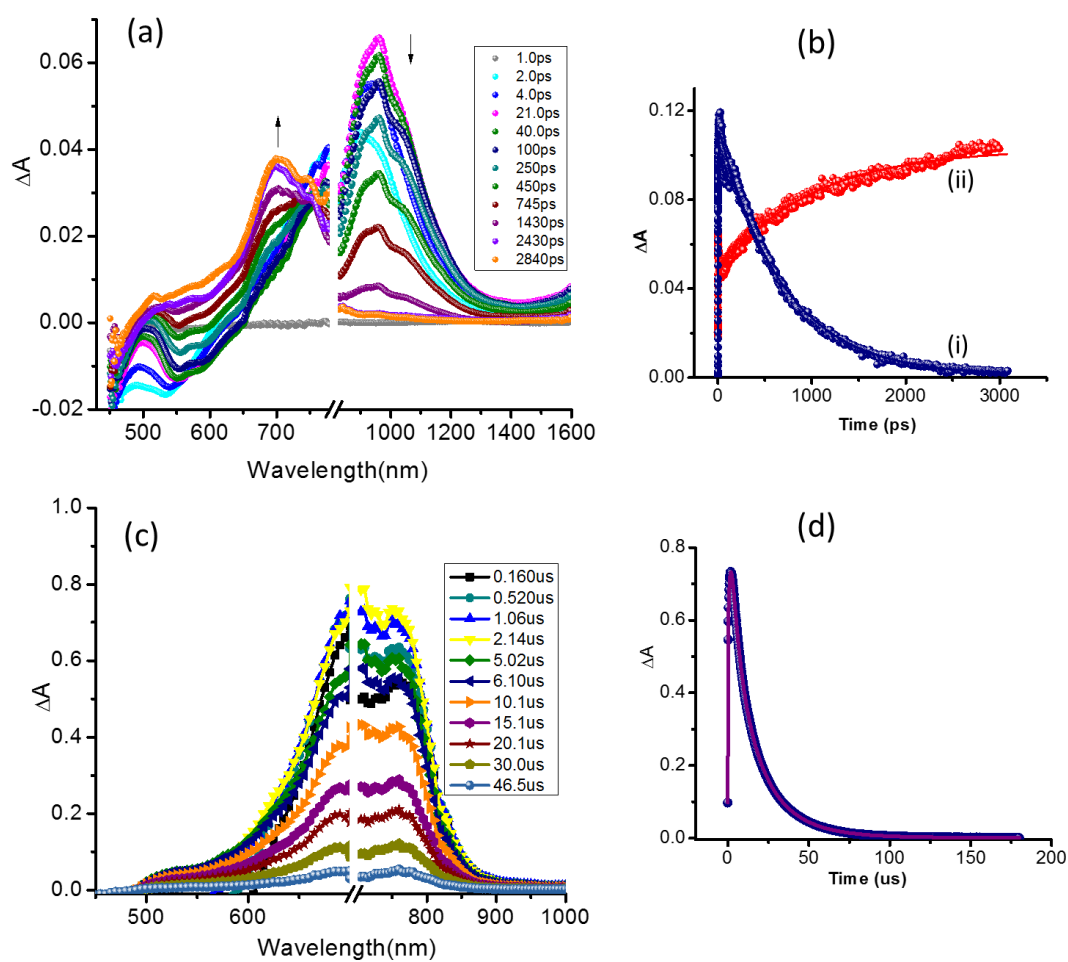

**Figure S19.** (a) Femtosecond transient absorption spectra of **9T** in THF, (b) time profiles of (i) 958 nm peak and (ii) 702 nm peak, (c) nanosecond transient spectra of **9T** in THF, and (d) time profile of the 752 nm peak.

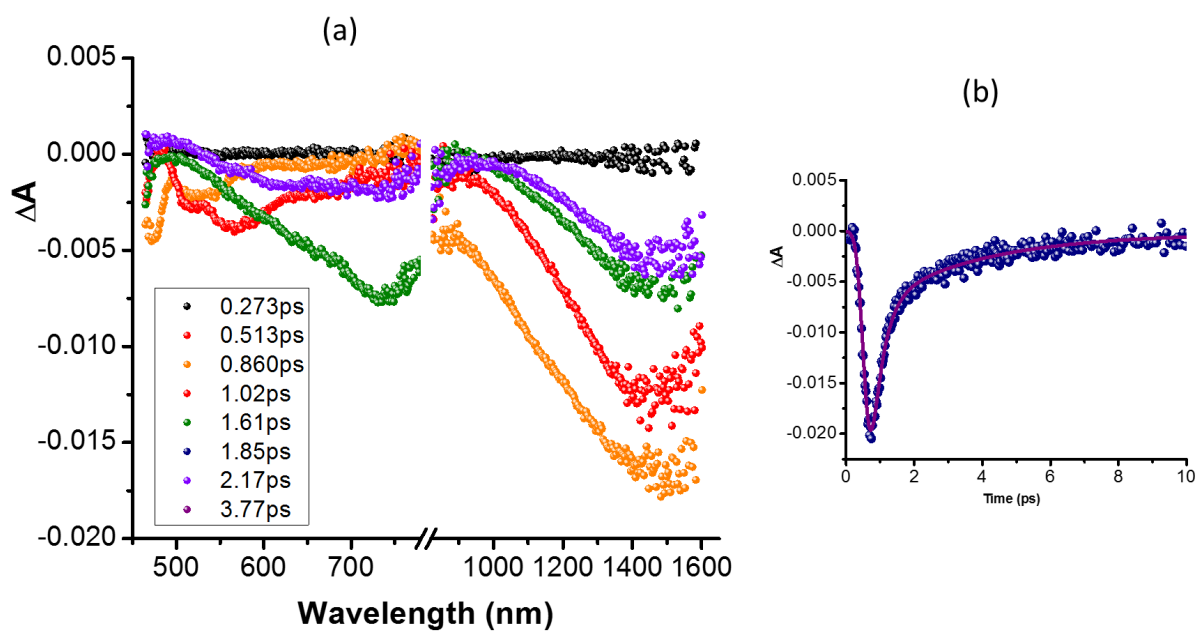

**Figure S20.** Femtosecond transient absorption spectra of eG in THF at the indicated delay times. (b) Time profiles of 1450 nm peak.

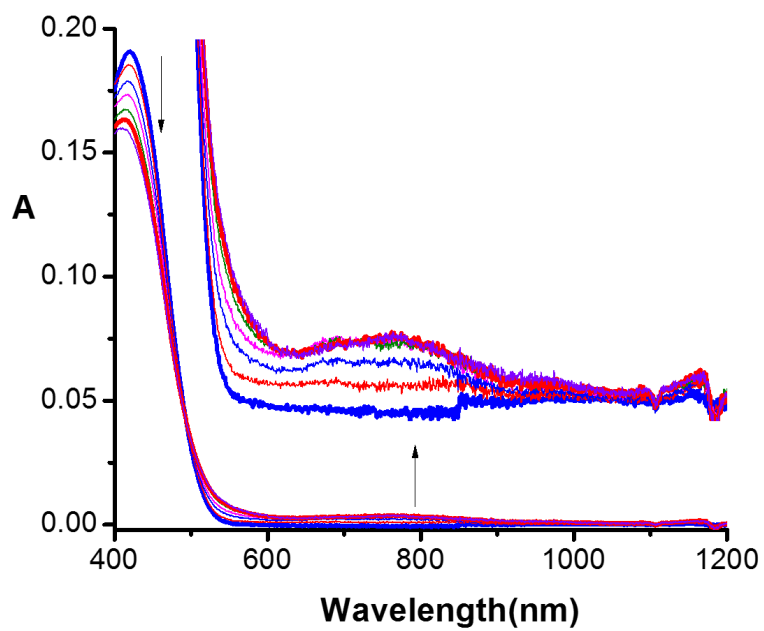

**Figure S21.** Spectral changes observed during chemical oxidation of **9T** in THF. Nitrosonium tetrafluoroborate was used as oxidant.
